# Supplementary material
Source: Research Square preprint supplement (doi:10.21203/rs.3.rs-9053133/v1)
Supplement: Supplementary file 1 [file 69a140fd281e72b7b6812132.docx]

Redundancy analysis (RDA) summarizing the effects of vegetation type, fire frequency, and soil variables on the abundance of useful tree species (food, construction/handcraft, and medicinal categories). Significance assessed using permutation tests (999 permutations).

(A) Overall model fit

| Component | Df | Variance | F | p-value | % explained |
| --- | --- | --- | --- | --- | --- |
| Constrained (model) | 6 | 0.15306 | 4.069 | 0.001 | 49.4 |
| Unconstrained (residual) | 25 | 0.15673 | - | - | 50.6 |
| Total | 31 | 0.3098 | - | - | 100 |
| R² | - | 0.494 | - | - | - |
| Adjusted R² | - | 0.373 | - | - | - |

(B) Effects of environmental predictors (sequential tests)

| Predictor | Df | Variance | F | p-value |
| --- | --- | --- | --- | --- |
| Vegetation type | 1 | 0.11271 | 17.978 | 0.001 *** |
| Fire frequency | 1 | 0.00314 | 0.5 | 0.604 |
| Slope | 1 | 0.00239 | 0.382 | 0.690 |
| Clay content | 1 | 0.01241 | 1.98 | 0.163 |
| Soil bulk density | 1 | 0.01029 | 1.641 | 0.193 |
| Soil pH | 1 | 0.01213 | 1.934 | 0.151 |

(C) Constrained axes

| Axis | Variance (eigenvalue) | F | p-value | % of constrained |
| --- | --- | --- | --- | --- |
| RDA1 | 0.13387 | 21.354 | 0.001 *** | 87.5 |
| RDA2 | 0.01758 | 3.252 | 0.117 | 11.5 |
| RDA3 | 0.00161 | 0.308 | 0.791 | 1.0 |
