# Supplementary material
Source: Research Square preprint supplement (doi:10.21203/rs.3.rs-9053133/v1)
Supplement: Supplementary file 2 [file 93126875ced0145157673f20.docx]

**Table 1** Phytosociological variables of forest and savanna vegetation formations sampled in the Xingu Indigenous Territory, in 2021.

| Variables | Savanna | Forest |
| --- | --- | --- |
| Total density per area (ind/ha) | 1042 ± 436 | 1355 ± 515 |
| Total basal area per area (m²/ha) | 12 ± 5 | 21 ± 19 |
| Number of species | 38 | 54 |
| Shannon-Wiener index (H') | 3.35 | 3.32 |
| Pielou's evenness (J) | 0.92 | 0.83 |

**Table 2.** List of tree species by family classified according to their useful applications to the Kuikuro people. C = Construction; M = Medicine; F = Food; M+C = Medicine and construction; M+F = Medicine and food; C+F = Construction and food.

| Species | C | M | F | | M+C | M+F | C+F |
| --- | --- | --- | --- | --- | --- | --- | --- |
| Anacardiaceae | | | | | | | |
| *Tapirira guianensis* | X |  |  |  | |  |  |
| Annonaceae | | | | | | | |
| *Annona neoinsignis* |  |  |  | X | |  |  |
| *Xylopia amazonica* |  |  |  |  | |  | X |
| *Xylopia frutescens* |  |  |  | X | |  |  |
| Apocynaceae | | | | | | | |
| *Aspidosperma macrocarpon* |  | X |  |  | |  |  |
| Bignoniaceae | | | | | | | |
| *Jacaranda copaia* |  |  |  | X | |  |  |
| *Tabebuia ochracea* |  | X |  |  | |  |  |
| Burseraceae | | | | | | | |
| *Dacryodes microcarpa* |  | X |  |  | |  |  |
| *Trattinnickia burserifolia* | X |  |  |  | |  |  |
| *Trattinnickia glaziovii* | X |  |  |  | |  |  |
| Calophyllaceae | | | | | | | |
| *Kielmeyera coriacea* |  |  |  |  | | X |  |
| Caryocaraceae | | | | | | | |
| *Caryocar brasiliense* |  |  | X |  | |  |  |
| Combretaceae | | | | | | | |
| *Terminalia argentea* |  | X |  |  | |  |  |
| *Terminalia tetraphylla* |  | X |  |  | |  |  |
| Dilleniaceae | | | | | | | |
| *Curatella americana* | X |  |  |  | |  |  |
| *Davilla elliptica* |  | X |  |  | |  |  |
| Elaeocarpaceae | | | | | | | |
| *Sloanea sinemariensis* | X |  |  |  | |  |  |
| Fabaceae | | | | | | | |
| *Bowdichia virgilioides* |  | X |  |  | |  |  |
| *Hymenaea courbaril* |  |  |  | X | |  |  |
| *Inga heterophylla* |  |  | X |  | |  |  |
| *Inga thibaudiana* |  |  |  |  | | X |  |
| *Ormosia paraensis* | X |  |  |  | |  |  |
| *Stryphnodendron adstringens* |  | X |  |  | |  |  |
| Humiriaceae | | | | | | | |
| *Sacoglottis guianensis* |  |  |  |  | |  | X |
| Lauraceae | | | | | | | |
| *Ocotea guianensis* |  |  |  | X | |  |  |
| Lythraceae | | | | | | | |
| *Lafoensia pacari* |  | X |  |  | |  |  |
| Malpighiaceae | | | | | | | |
| *Byrsonima aerugo* |  |  |  |  | | X |  |
| *Byrsonima crassifolia* |  |  |  |  | | X |  |
| *Byrsonima pachyphylla* |  |  |  |  | | X |  |
| Melastomataceae | | | | | | | |
| *Miconia minutiflora* | X |  |  |  | |  |  |
| *Miconia punctata* | X |  |  |  | |  |  |
| *Mouriri elliptica* |  |  | X |  | |  |  |
| Menispermaceae | | | | | | | |
| *Abuta grandifolia* | X |  |  |  | |  |  |
| Metteniusaceae | | | | | | | |
| *Emmotum nitens* |  |  |  | X | |  |  |
| Moraceae | | | | | | | |
| *Pseudolmedia macrophylla* |  |  |  |  | |  | X |
| Nyctaginaceae | | | | | | | |
| *Neea theifera* | X |  |  |  | |  |  |
| Ochnaceae | | | | | | | |
| *Ouratea discophora* |  |  |  | X | |  |  |
| Rubiaceae | | | | | | | |
| *Amaioua guianensis* | X |  |  |  | |  |  |
| Urticaceae | | | | | | | |
| *Cecropia palmata* |  |  |  |  | |  | X |
| Vochysiaceae | | | | | | | |
| *Qualea grandiflora* |  | X |  |  | |  |  |
| *Qualea parviflora* |  | X |  |  | |  |  |
| *Vochysia vismiifolia* | X |  |  |  | |  |  |
